# Supplementary material for: CO2 fixation at atmospheric pressure: porous ZnSnO3 nanocrystals as a highly efficient catalyst for the synthesis of cyclic carbonates
Source: Royal Society of Chemistry journal article supplement (doi:10.1039/c6ra02969h), 2016-01-01

## Supplementary Information

CO<sub>2</sub> fixation at atmospheric pressure: porous ZnSnO<sub>3</sub> nanocrystals as highly efficient catalyst for synthesis of cyclic carbonates

Susmita Roy,<sup>a§</sup> Biplab Banerjee,<sup>b§</sup> Asim Bhaumik<sup>b\*</sup> and Sk. Manirul Islam<sup>a\*</sup>

<sup>a</sup>*Department of Chemistry, University of Kalyani, Nadia, 741235, West Bengal, India.*

<sup>b</sup>*Department of Material Science, Indian Association for the Cultivation of Science, Kolkata-700032, India.*

<sup>§</sup>*These two authors have equally contributed in this work*

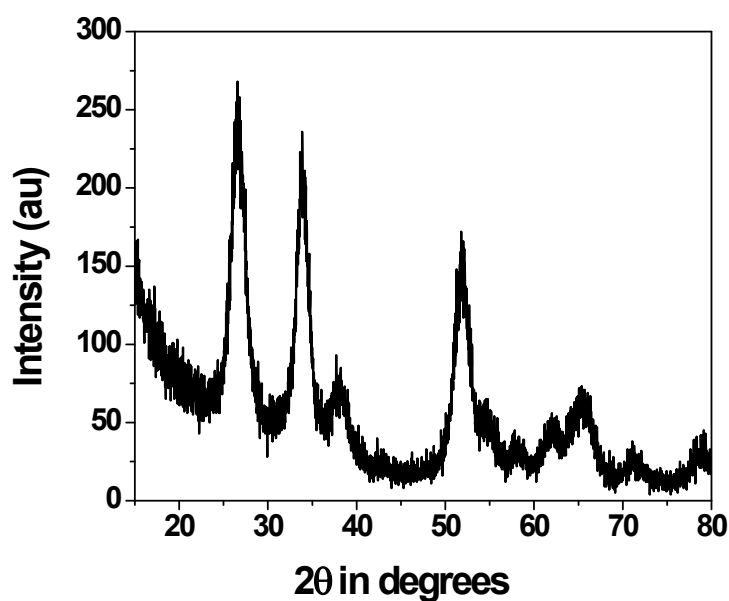

**Figure S1.** Wide angle powder XRD pattern of meso-SnO<sub>2</sub>

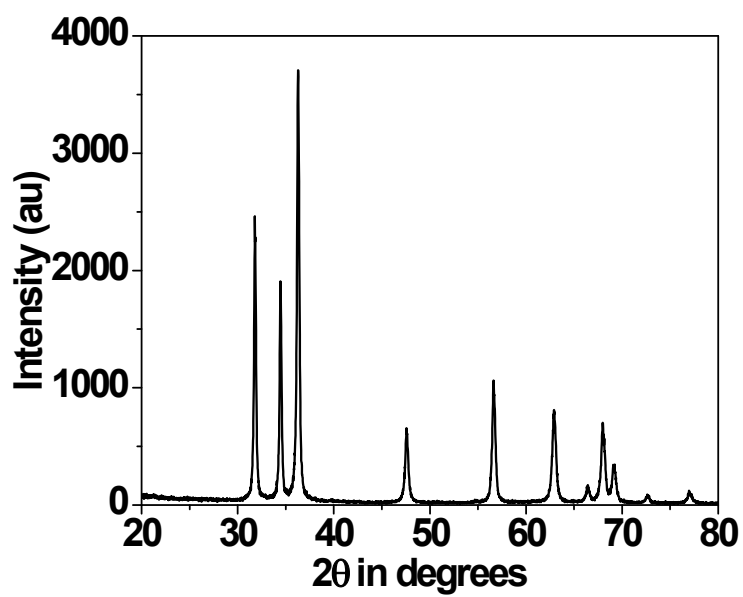

**Figure S2.** Wide angle powder XRD pattern of meso-ZnO

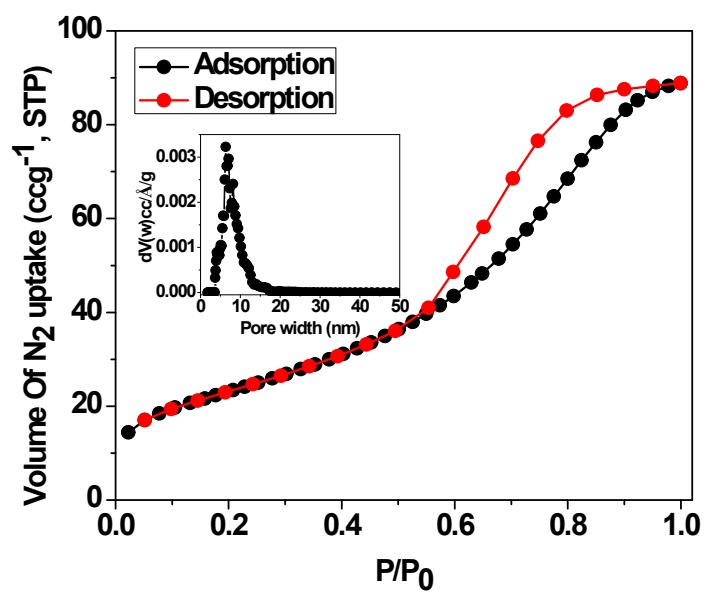

**Figure S3.** N<sub>2</sub> adsorption-desorption isotherm of the meso SnO<sub>2</sub>. Pore size distribution (PSD) is shown in the inset of the figure employing NLDFT model.

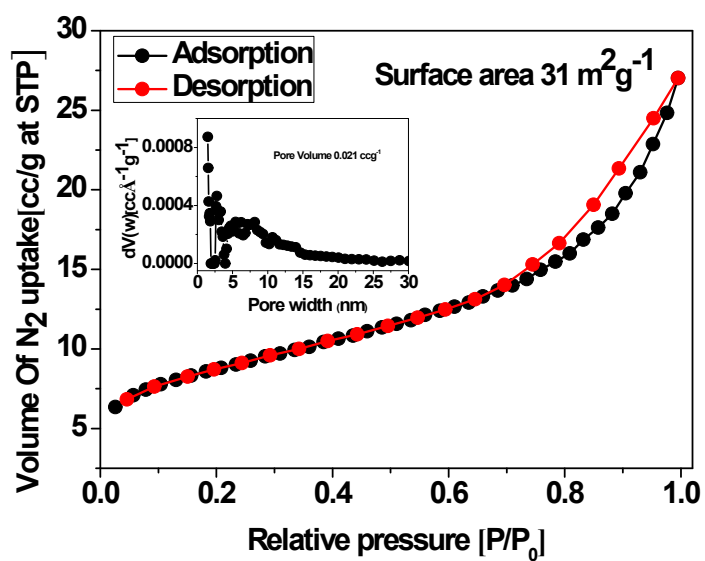

**Figure S4.**  $N_2$  adsorption-desorption isotherm of the meso ZnO. Pore size distribution (PSD) is shown in the inset of the figure employing NLDFT model.

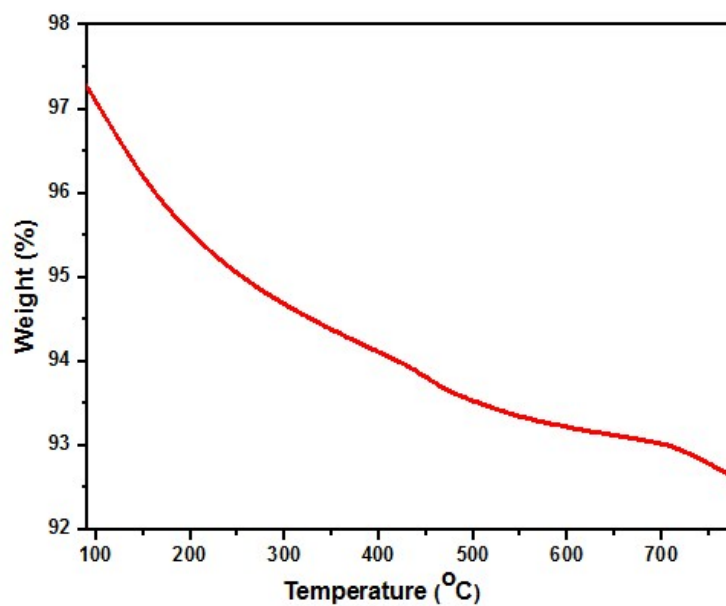

**Figure S5.** TGA profile of MZS-1 catalyst.

## Analytical Data of Synthesized Cyclic carbonates

### 4-phenyl-1,3-dioxolan-2-one (Table 2, entry 1)

White solid,  $^1\text{H}$  NMR (400 MHz,  $\text{CDCl}_3$ ):  $\delta$  4.28 (t,  $J = 8.4$  Hz, 1H), 4.73 (t,  $J = 8.4$  Hz, 1H), 5.61 (t,  $J = 8.0$  Hz, 1H), 7.28-7.30 (m, 2H), 7.33-7.41 (m, 3H) ppm.;  $^{13}\text{C}$  NMR (100.0 MHz,  $\text{CDCl}_3$ )  $\delta$  71.2, 77.8, 125.8, 129.1, 129.7, 135.8, 154.9 ppm

### 4-(phenoxyethyl)-1,3-dioxolan-2-one (Table 2, entry 2)

White solid.  $^1\text{H}$  NMR (400 MHz,  $\text{CDCl}_3$ ):  $\delta$  4.18 (dd,  $J = 11.2, 4.8$  Hz, 1H), 4.26 (dd,  $J = 11.4, 2.8$  Hz, 1H), 4.36-4.39 (m, 1H), 4.62 (t,  $J = 8.1$  Hz, 1H), 5.12-5.16 (m, 1H), 6.93-6.98 (m, 3H), 7.28-7.32 (m, 2H) ppm;  $^{13}\text{C}$  NMR (100.0 MHz,  $\text{CDCl}_3$ )  $\delta$  66.0, 67.3, 74.8, 114.6, 121.2, 129.5, 154.8, 157.9 ppm.

### 4-(isopropoxymethyl)-1,3-dioxolan-2-one (Table 2, entry 3)

Yellow liquid;  $^1\text{H}$  NMR (400 MHz,  $\text{CDCl}_3$ )  $\delta$  1.57 (d,  $J = 5.6$  Hz, 6 H), 3.59-3.68 (m, 3 H), 4.36-4.41 (m, 1H), 4.47 (t,  $J = 8.5$  Hz, 1 H), 4.76-4.80 (m, 1 H);  $^{13}\text{C}$  NMR (100.6 MHz,  $\text{CDCl}_3$ )  $\delta$  21.5, 21.6, 66.2, 66.9, 72.7, 75.1, 155.0.

### 4-methyl-1,3-dioxolan-2-one (Table 2, entry 4)

Yellowish oil,  $^1\text{H}$  NMR (400 MHz,  $\text{CDCl}_3$ )  $\delta$  1.50 (d,  $J = 6.4$  Hz, 1 H), 4.02-4.06 (m, 1 H), 4.57 (t,  $J = 8.4$  Hz, 1 H), 4.83-4.91 (m, 1 H) ppm.;  $^{13}\text{C}$  NMR (100 MHz,  $\text{CDCl}_3$ )  $\delta$  19.4, 70.6, 73.5, 155.0 ppm.

**2-(allyloxymethyl)oxirane (Table 2, entry 5)**

Colourless liquid;  $^1\text{H NMR}$  (500 MHz,  $\text{CDCl}_3$ )  $\delta$  3.58-3.70 (m, 2 H), 4.03-4.05 (m, 2 H), 4.36-4.40 (m, 1H), 4.49 (t,  $J = 8$  Hz, 1 H), 4.78-4.84 (m, 2H), 5.80-5.89 (m, 2H) ppm.;  $^{13}\text{C NMR}$  (125 MHz,  $\text{CDCl}_3$ )  $\delta$  66.4, 68.9, 72.7, 75.1, 118.0, 133.7, 155.0 ppm.

**4-(Hydroxymethyl)-1,3-dioxolan-2-one (Table 2, entry 6)**

$^1\text{H NMR}$  (400 MHz,  $\text{CDCl}_3$ )  $\delta$  4.81 (m, 1 H), 4.59 – 4.43 (m, 2 H), 4.00 (ddd,  $J = 12.8, 5.0, 2.9$  Hz, 1 H), 3.72 (ddd,  $J = 12.8, 6.6, 3.4$  Hz, 1 H), 2.80 (br s, 1 H) ppm.  $^{13}\text{C NMR}$  (75 MHz,  $\text{CDCl}_3$ )  $\delta$  156.0, 76.7, 65.8, 61.0 ppm.

**4-(chloromethyl)-1,3-dioxolan-2-one (Table 2, entry 7)**

Yellowish oil,  $^1\text{H NMR}$  (400 MHz,  $\text{CDCl}_3$ )  $\delta$  3.70 (dd,  $J = 12.2, 3.6$  Hz, 1H), 3.79 (dd,  $J = 12.2, 4.8$  Hz, 1H), 4.36-4.40 (m, 1 H), 4.57 (t,  $J = 8.4$  Hz, 1 H), 4.95-5.0 (m, 1H) ppm.;  $^{13}\text{C NMR}$  (100 MHz,  $\text{CDCl}_3$ )  $\delta$  43.9, 67.0, 74.4, 154.8 ppm.

# Scan copies of $^1\text{H}$ and $^{13}\text{C}$ NMR Spectra

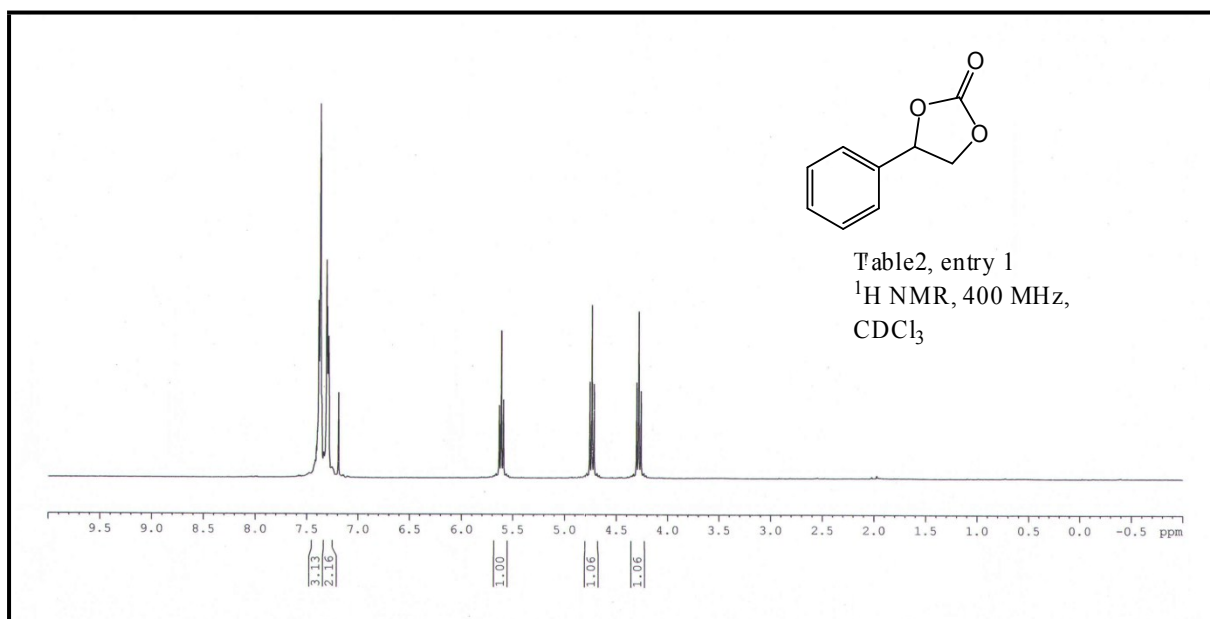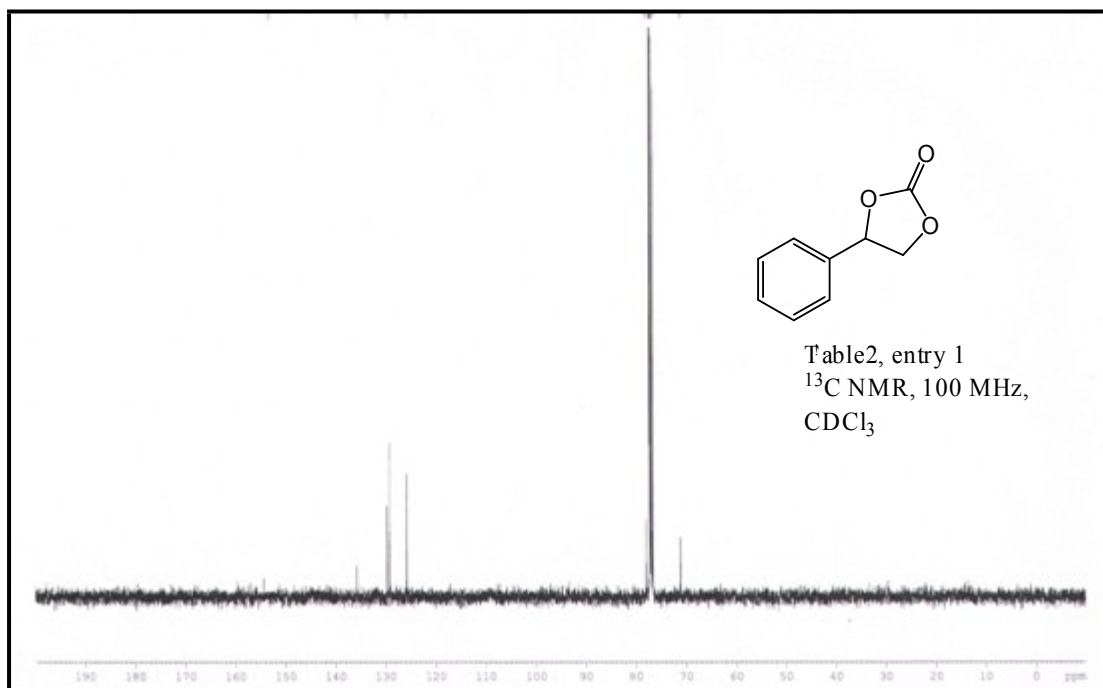

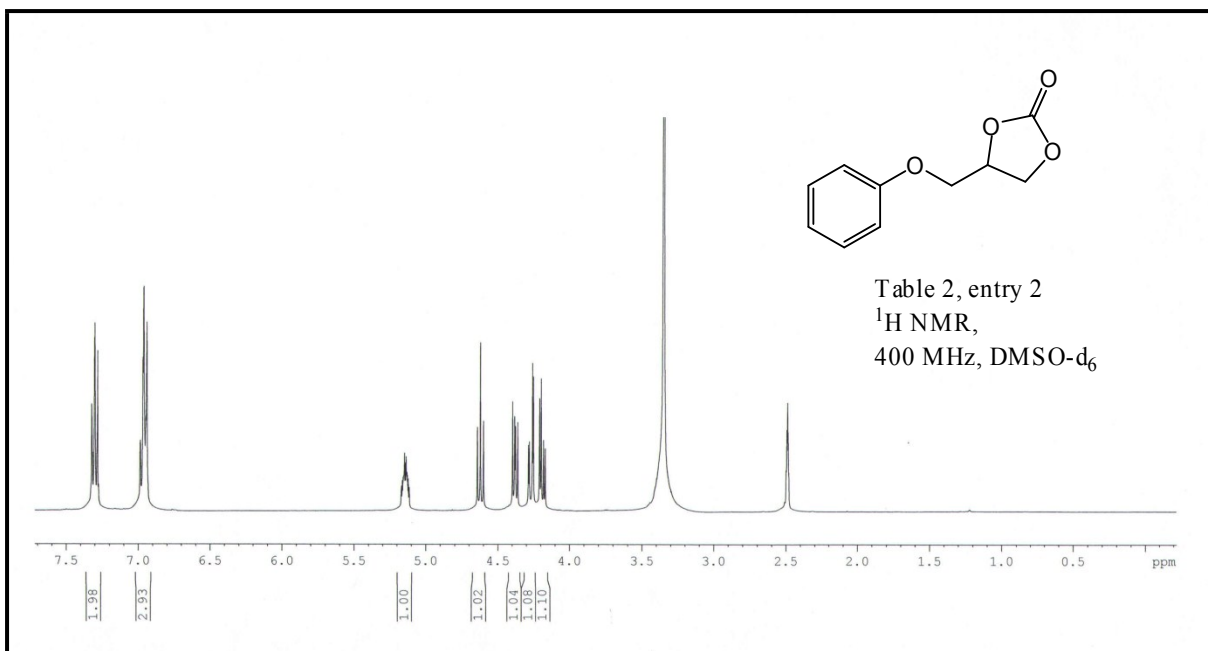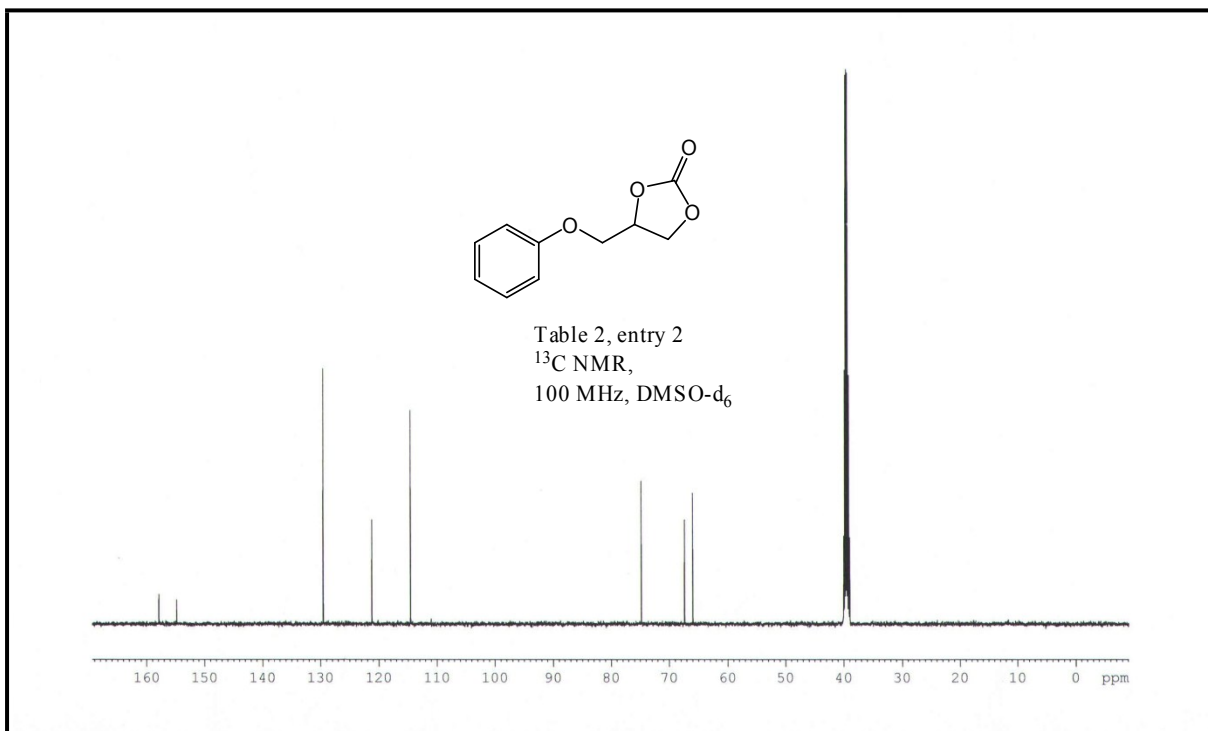



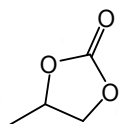

Table 2, entry 4  
 $^1\text{H}$  NMR,  
400 MHz,  $\text{CDCl}_3$

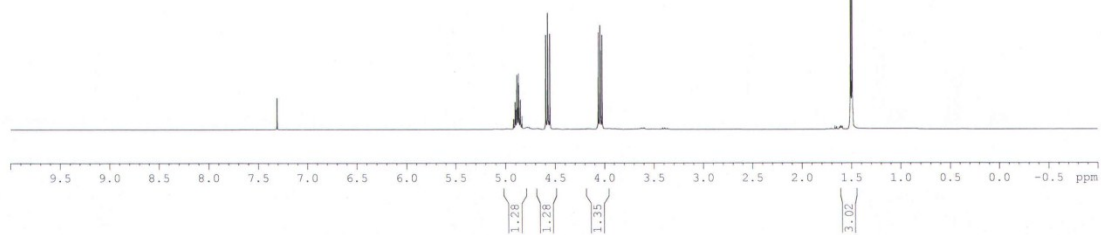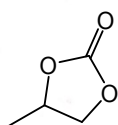

Table 2, entry 4  
 $^{13}\text{C}$  NMR,  
100 MHz,  $\text{CDCl}_3$

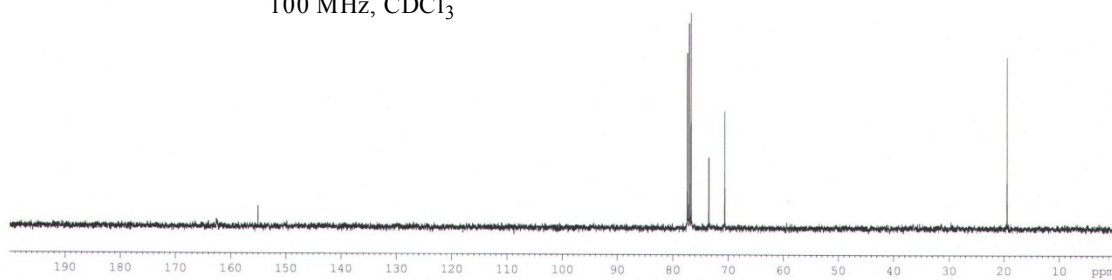

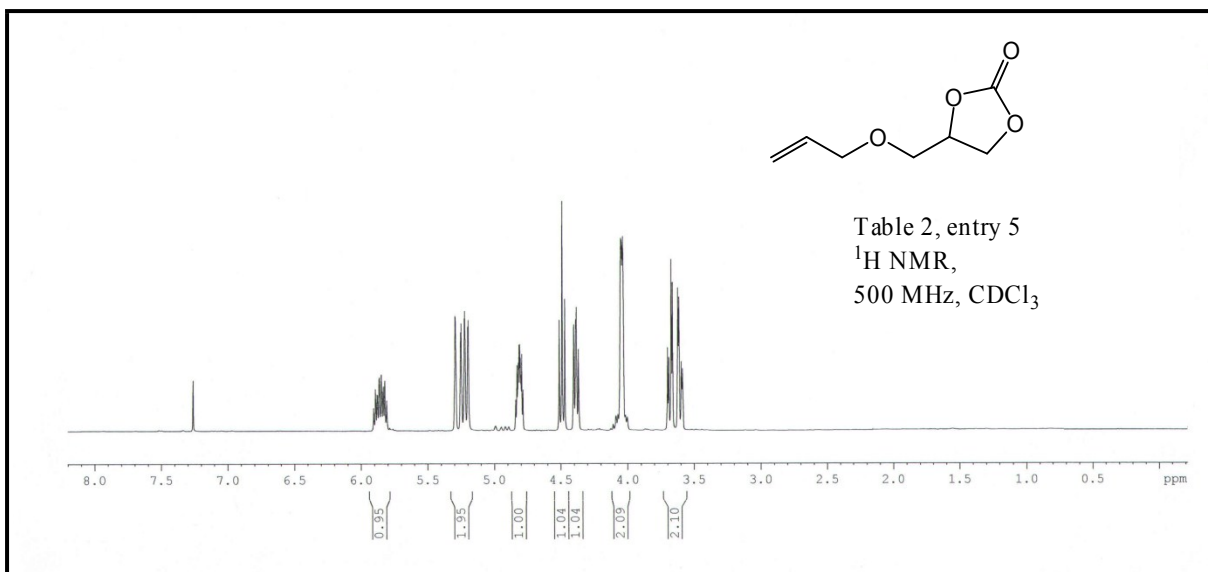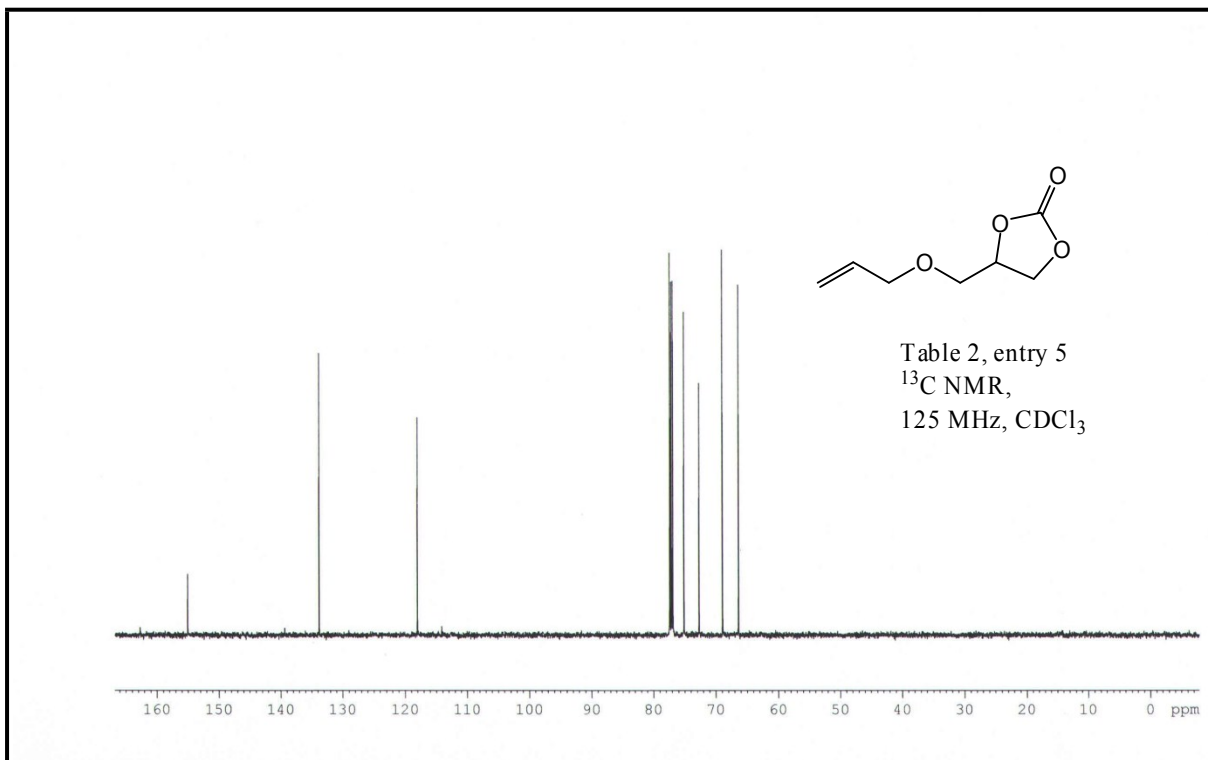

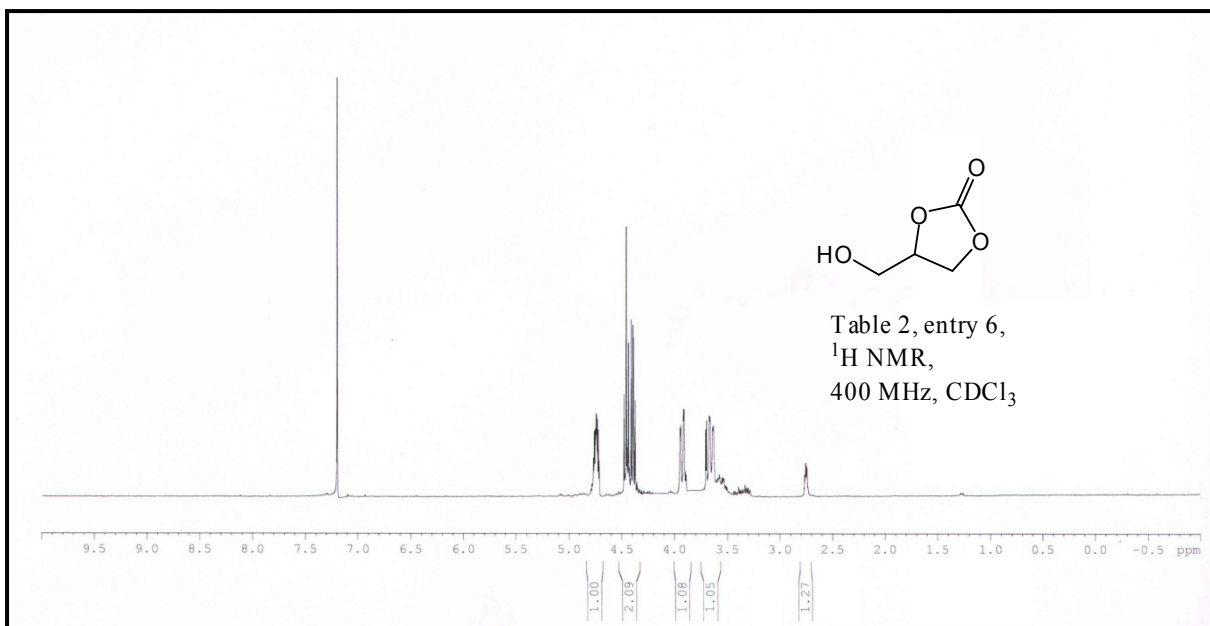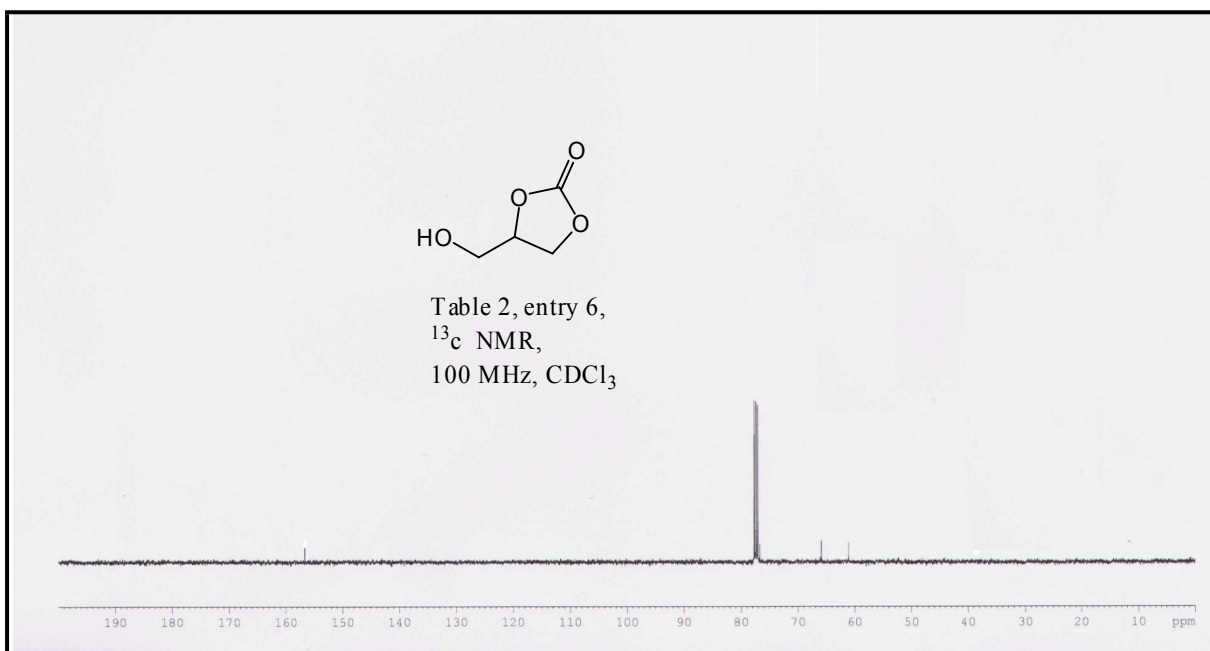

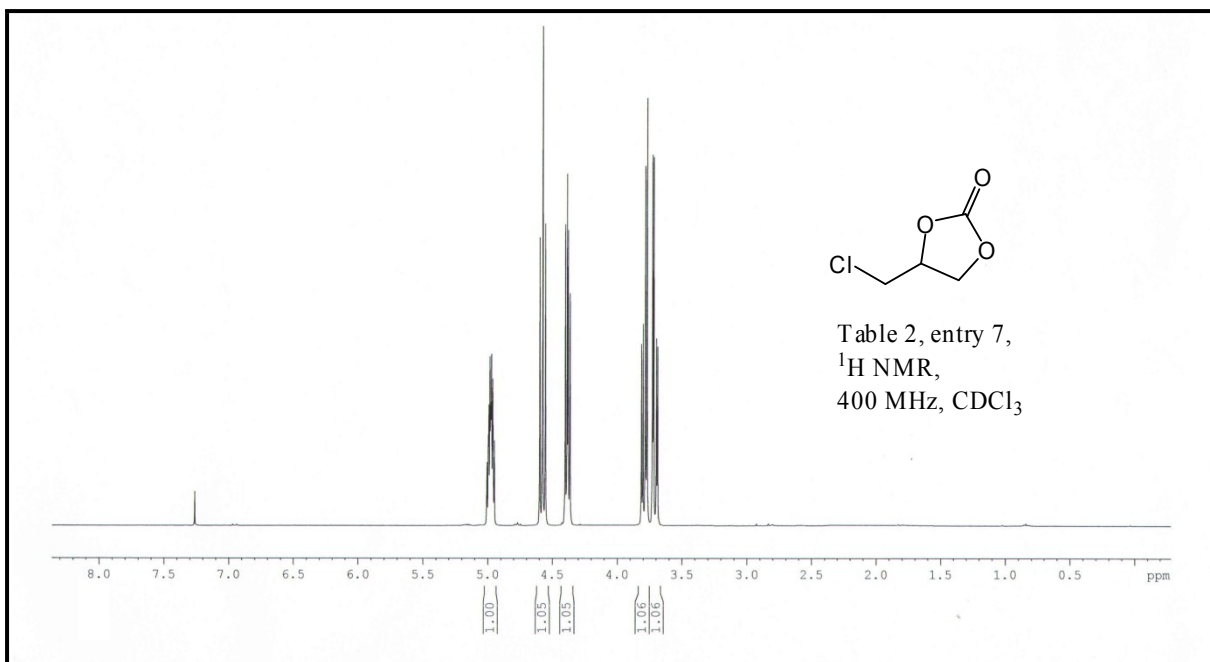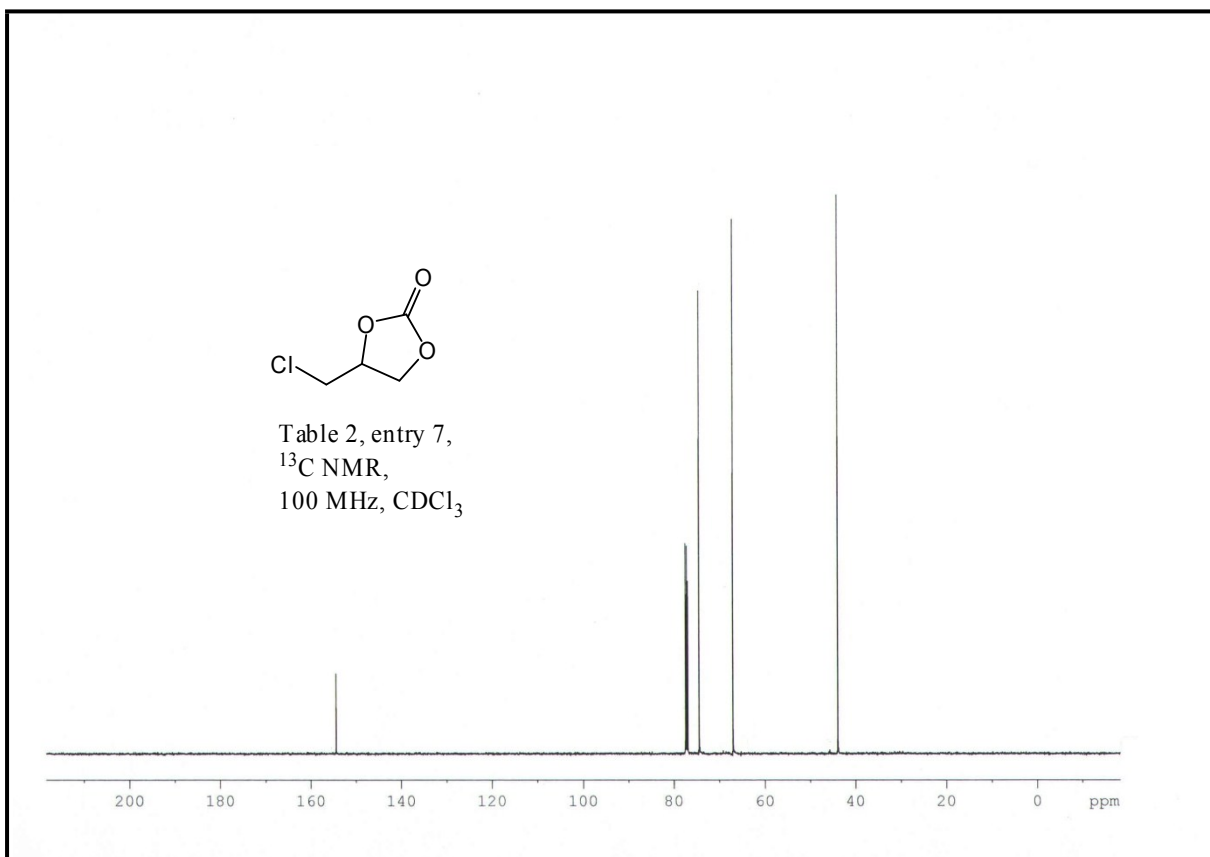

Supplement: c6ra02969h1.pdf [file c6ra02969h1.pdf]
